# Supplementary material
Source: publisher site journal article supplement (https://www.dovepress.com/article/493992)
Supplement: Supplementary file 1 [file get_supplementary_file.php]

**Survey**

**Demographic Information**

**Sex:**

- Male
- Female

**Age:
BMI (kg/m²):
Occupation:**

- Employed
- Unemployed
- Retired

**Education Level:**

- Primary school completed
- Secondary school completed
- University degree completed
- Postgraduate degree completed

**Comorbidities:**

- Overweight
- Obesity
- Type II Diabetes Mellitus
- Hypertension
- Dyslipidemia
- Thyroid disorder
- Cancer
- Other
- None

**Smoking History:**

- Current smoker
- Former smoker
- Non-smoker

**Number of packs/year:**

**Number of exacerbations in the last year:**

- 0
- 1
- 2 or more

**Number of hospitalizations due to COPD in the last year:**

**Number of inhaled medications:**

- 0
- 1
- 2 or more

**List of patient’s inhaled medications:**

**Patient’s mMRC grade:**

- Less than 2
- 2 or greater

**Patient’s GOLD category:**

- A
- B
- C
- D

**TAI Test - Adherence to Inhalation Therapy**

1. **In the past 7 days, how often did you forget to use your regular inhalers?**
   1. Always
   2. More than half the time
   3. About half the time
   4. Less than half the time
   5. Never
2. **Do you forget to use your inhalers?**
   1. Always
   2. Almost always
   3. Sometimes
   4. Rarely
   5. Never
3. **When you feel well, do you stop using your inhalers?**
   1. Always
   2. Almost always
   3. Sometimes
   4. Rarely
   5. Never
4. **When on vacation or during weekends, do you stop using your inhalers?**
   1. Always
   2. Almost always
   3. Sometimes
   4. Rarely
   5. Never
5. **When you feel nervous or sad, do you stop using your inhalers?**
   1. Always
   2. Almost always
   3. Sometimes
   4. Rarely
   5. Never
6. **Do you stop using your inhalers due to fear of possible side effects?**
   1. Always
   2. Almost always
   3. Sometimes
   4. Rarely
   5. Never
7. **Do you stop using your inhalers because you think they are not helpful for treating your disease?**
   1. Always
   2. Almost always
   3. Sometimes
   4. Rarely
   5. Never
8. **Do you use fewer inhalations than prescribed by your doctor?**
   1. Always
   2. Almost always
   3. Sometimes
   4. Rarely
   5. Never
9. **Do you stop using your inhalers because you feel they interfere with your daily or work life?**
   1. Always
   2. Almost always
   3. Sometimes
   4. Rarely
   5. Never
10. **Do you stop using your inhalers because of difficulty affording them?**
    1. Always
    2. Almost always
    3. Sometimes
    4. Rarely
    5. Never
